# Supplementary material
Source: publisher figshare collection journal article supplement (https://acs.figshare.com/ndownloader/files/15147458)
Supplement: Supplementary file 1 [file 15147458]

## **Supporting Information**

Facile and Green Method To Structure Ultralow-Threshold and Lightweight  
Polystyrene/MWCNT Composites with Segregated Conductive Networks for  
Efficient Electromagnetic Interference Shielding

Jia Chen, Xia Liao\*, Wei Xiao, Jianming Yang, Qiuyue Jiang, Guangxian Li

*College of Polymer Science and Engineering, State Key Laboratory of Polymer  
Materials Engineering, Sichuan University, No. 24 South Section 1, Yihuan Road,  
Chengdu 610065, Sichuan, China.*

*E-mail: [xliao@scu.edu.cn](mailto:xliao@scu.edu.cn), Tel.: +86 28 8540 8361*

This Supporting Information has the total number of 3 pages, and it contains 2 figure  
and some explanations.

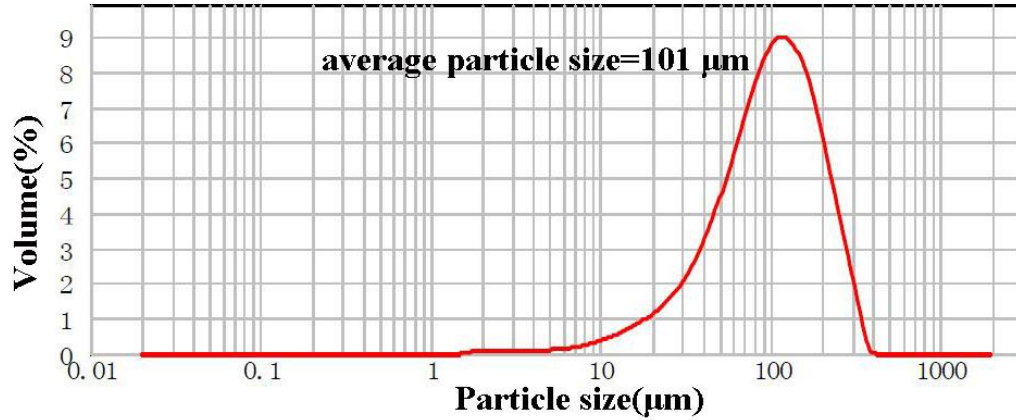

**Figure S1.** The size distribution of PS particles.

The size of PS particles was related to conductivity and EMI SE. Li et al.<sup>1</sup> prepared PS/graphene composites with segregated structure and researched the effect of particle size on EMI SE. The results showed that EMI SE of composites improves with the increase of particle diameter from 600 nm to 96  $\mu\text{m}$  because reducing particle size means thinner or discontinuous conductive layers at the same graphene loading. Other reports in the literature<sup>2</sup> have also indicated that the average particle size of  $\sim 100\ \mu\text{m}$  would be better to construct segregated conductive networks.

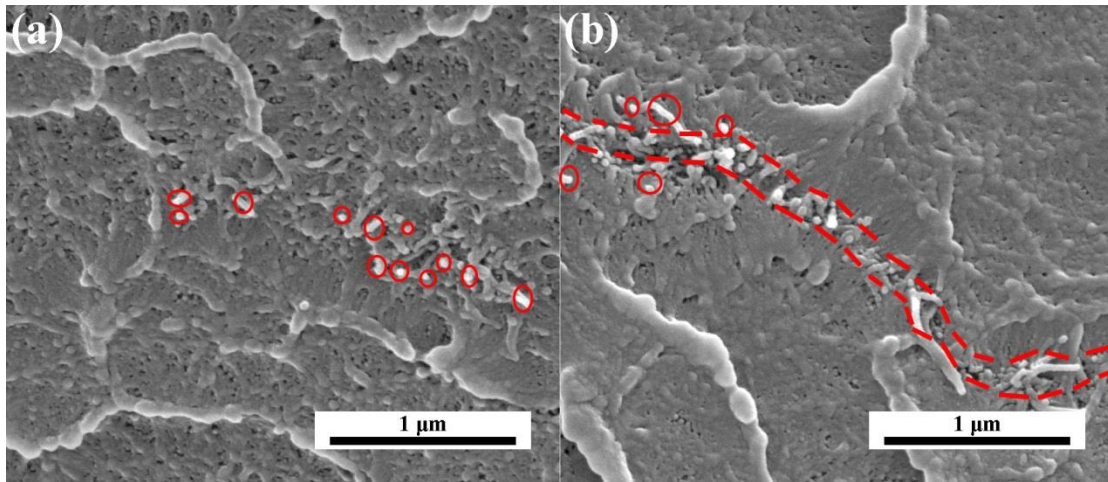

**Figure S2.** SEM micrographs of PS/MWCNT with MWCNT scattering in a narrow region between PS particles: (a) containing 0.06 vol% MWCNT; (b) containing 0.3 vol% MWCNT

## REFERENCES

- (1) Yan, D. X.; Pang, H.; Li, B.; Vajtai, R.; Xu, L.; Ren, P. G.; Wang, J. H.; Li, Z. M. Structured Reduced Graphene Oxide/Polymer Composites for Ultra-Efficient Electromagnetic Interference Shielding. *Adv. Funct. Mater.* **2015**, *25*, 559-566.
- (2) Cui, C.-H.; Yan, D.-X.; Pang, H.; Xu, X.; Jia, L.-C.; Li, Z.-M. Formation of a Segregated Electrically Conductive Network Structure in a Low-Melt-Viscosity Polymer for Highly Efficient Electromagnetic Interference Shielding. *ACS Sustainable Chem. Eng.* **2016**, *4*, 4137-4145.
